# Supplementary material for: Viscoelastic parameters derived from multifrequency MR elastography for depicting hepatic fibrosis and inflammation in chronic viral hepatitis
Source: Springer Nature journal article supplement (doi:10.1186/s13244-024-01652-5), 2024-03-26
Supplement: MOESM1 [file 26899286]

**Viscoelastic parameters derived from multifrequency MR elastography for depicting hepatic fibrosis and inflammation in chronic viral hepatitis**  
**ELECTRONIC SUPPLEMENTARY MATERIAL**

**Supplementary Table 1:** Multiparametric MRI protocol

|                                  | T1-weighted | T2- weighted |         |
|----------------------------------|-------------|--------------|---------|
|                                  | Axial       | Axial        | Coronal |
| Repetition time (msec)           | 4.85        | 3000         | 1200    |
| Echo time (msec)                 | 2.41        | 95           | 91      |
| Flip angle (degree)              | 10          | 140          | 180     |
| Field of view (mm <sup>2</sup> ) | 380×309     | 380×380      | 380×380 |
| Matrix size                      | 320×240     | 320×320      | 256×256 |
| Section thickness (mm)           | 3           | 5            | 6       |

**Supplementary Table 2:** Pulse Sequence parameters for multifrequency MR elastography

| Parameters                       | Multifrequency MR elastography |
|----------------------------------|--------------------------------|
|                                  | Aera (SIEMENS)                 |
| Filed Strength (T)               | 1.5                            |
| Sequence                         | SE-EPI                         |
| Echo time (msec)                 | 59.0                           |
| Repetition time (msec)           | 2050                           |
| Field of view (mm <sup>2</sup> ) | 312×384                        |
| Matrix                           | 128×104                        |
| Resolution (mm <sup>2</sup> )    | 3× 5 × 3                       |
| Number of Slices                 | 15                             |
| Slice Thickness (mm)             | 4                              |
| Slice Gap (mm)                   | 2                              |
| Frequency (Hz)                   | 30, 40, 50, 60                 |
| Encoding Direction               | x, y, z                        |
| Breath Control                   | Free breathing                 |
| Imaging time (min)               | 3:30                           |

Note: SE-EPI = spin-echo echo planar imaging

**Supplementary Table 3:** The Scheuer scoring System for necro-inflammatory activity and fibrosis in Chronic Hepatitis

A simple system for Scoring necro-inflammatory activity, fibrosis and cirrhosis in Chronic Hepatitis

| Grade | Portal/Periportal Activity                                     | Lobular Activity                   |
|-------|----------------------------------------------------------------|------------------------------------|
| 0     | None or minimal                                                | None                               |
| 1     | Portal inflammation                                            | Inflammation but no necrosis       |
| 2     | Mild piecemeal necrosis                                        | Focal necrosis or acidophil bodies |
| 3     | Moderate piecemeal necrosis                                    | Severe focal cell damage           |
| 4     | Severe piecemeal necrosis                                      | Damage includes bridging necrosis  |
| Stage | Fibrosis                                                       |                                    |
| 0     | None                                                           |                                    |
| 1     | Enlarged, fibrotic portal tracts                               |                                    |
| 2     | Periportal or portal-portal septa but intact architecture      |                                    |
| 3     | Fibrosis with architecture distortion but no obvious cirrhosis |                                    |
| 4     | Probable or define cirrhosis                                   |                                    |

The degree of liver tissue damage was expressed by inflammation grade (grading, G) and fibrosis stage (staging, S). Grading was based on the degree of necrosis and inflammation, assessing the activity of the disease; staging was based on the degree of fibrosis and formation of cirrhosis, indicating the progress of the disease

**Supplementary Table 4: Mean  $c$  and  $\varphi$  measurements of subgroups in fibrosis or inflammation.**

| Stage of fibrosis     | $c$ (m/s) | $\varphi$ (rad) | Kruskal-Wallis Test for distinguishing with $c$       |        |        |        |
|-----------------------|-----------|-----------------|-------------------------------------------------------|--------|--------|--------|
|                       |           |                 | S(0-1)                                                | S2     | S3     | S4     |
| S0-1 (n = 35)         | 1.54±0.19 | 0.66±0.09       | /                                                     | <0.05* | <0.05* | <0.05* |
| S2 (n = 37)           | 1.71±0.18 | 0.70±0.07       | <0.05*                                                | /      | <0.05* | <0.05* |
| S3 (n = 18)           | 1.97±0.28 | 0.76±0.09       | <0.05*                                                | <0.05* | /      | <0.05* |
| S4 (n = 80)           | 2.14±0.35 | 0.82±0.11       | <0.05*                                                | <0.05* | <0.05* | /      |
| Grade of inflammation | $c$ (m/s) | $\varphi$ (rad) | Kruskal-Wallis Test for distinguishing with $\varphi$ |        |        |        |
|                       |           |                 | G(0-1)                                                | G2     | G3     | G4     |
| G0-1 (n = 54)         | 1.75±0.29 | 0.70±0.08       | /                                                     | <0.05* | <0.05* | <0.05* |
| G2 (n = 82)           | 1.88±0.33 | 0.74±0.09       | <0.05*                                                | /      | <0.05* | <0.05* |
| G3 (n = 21)           | 2.14±0.21 | 0.85±0.10       | <0.05*                                                | <0.05* | /      | 0.11   |
| G4 (n = 13)           | 2.37±0.59 | 0.94±0.10       | <0.05*                                                | <0.05* | 0.11   | /      |

Note: \*Statistically significantly difference between various fibrosis and inflammation groups ( $p < 0.05$ )

$c$  = shear wave speed,  $\varphi$  = loss angle of the complex shear modulus, S = staging, fibrosis stage, G = grading, inflammation grade

**Supplementary Table 5:** Univariable and Multivariate Logistic Regression Analyses of Variables Associated with fibrosis and inflammation in Training cohort

| Parameter | Univariate |                 | Multivariate |                 |           | Univariate |                 | Multivariate |                |
|-----------|------------|-----------------|--------------|-----------------|-----------|------------|-----------------|--------------|----------------|
|           | Odds Ratio | <i>p</i> -Value | Odds Ratio   | <i>p</i> -Value |           | Odds Ratio | <i>p</i> -Value | Odds Ratio   | <i>P</i> Value |
| ≥S1       |            |                 |              |                 | ≥G2       |            |                 |              |                |
| <i>c</i>  | 13957.87   | <0.05*          | 13957.87     | <0.05*          | <i>c</i>  | 8.92       | <0.05*          |              |                |
| $\varphi$ | 45896.92   | <0.05*          |              |                 | $\varphi$ | 2468.83    | <0.05*          | 2468.83      | <0.05*         |
| ≥S2       |            |                 |              |                 | ≥G3       |            |                 |              |                |
| <i>c</i>  | 328.97     | <0.05*          | 167.82       | <0.05*          | <i>c</i>  | 23.90      | <0.05*          |              |                |
| $\varphi$ | 67534.71   | <0.05*          |              |                 | $\varphi$ | 11525      | <0.05*          | 11525        | <0.05*         |
| S3        |            |                 |              |                 | G4        |            |                 |              |                |
| <i>c</i>  | 632.50     | <0.05*          | 376.04       | <0.05*          | <i>c</i>  | 17.57      | <0.05*          |              |                |
| $\varphi$ | 544629.32  | <0.05*          |              |                 | $\varphi$ | 10158      | <0.05*          | 10158        | <0.05*         |
| S4        |            |                 |              |                 |           |            |                 |              |                |
| <i>c</i>  | 137.42     | <0.05*          | 70.67        | <0.05*          |           |            |                 |              |                |
| $\varphi$ | 144369.23  | <0.05*          |              |                 |           |            |                 |              |                |

Note: \*Statistically significantly difference between fibrosis and inflammation groups ( $p < 0.05$ )

*c* = shear wave speed,  $\varphi$  = loss angle of the complex shear modulus, S = staging, fibrosis stage, G = grading, inflammation grade
